# Supplementary material
Source: PubMed Central journal article supplement (PMC4651039)
Supplement: supp_djv101_Supplementary_Figure_1.pdf [file supp_djv101_Supplementary_Figure_1.pdf]

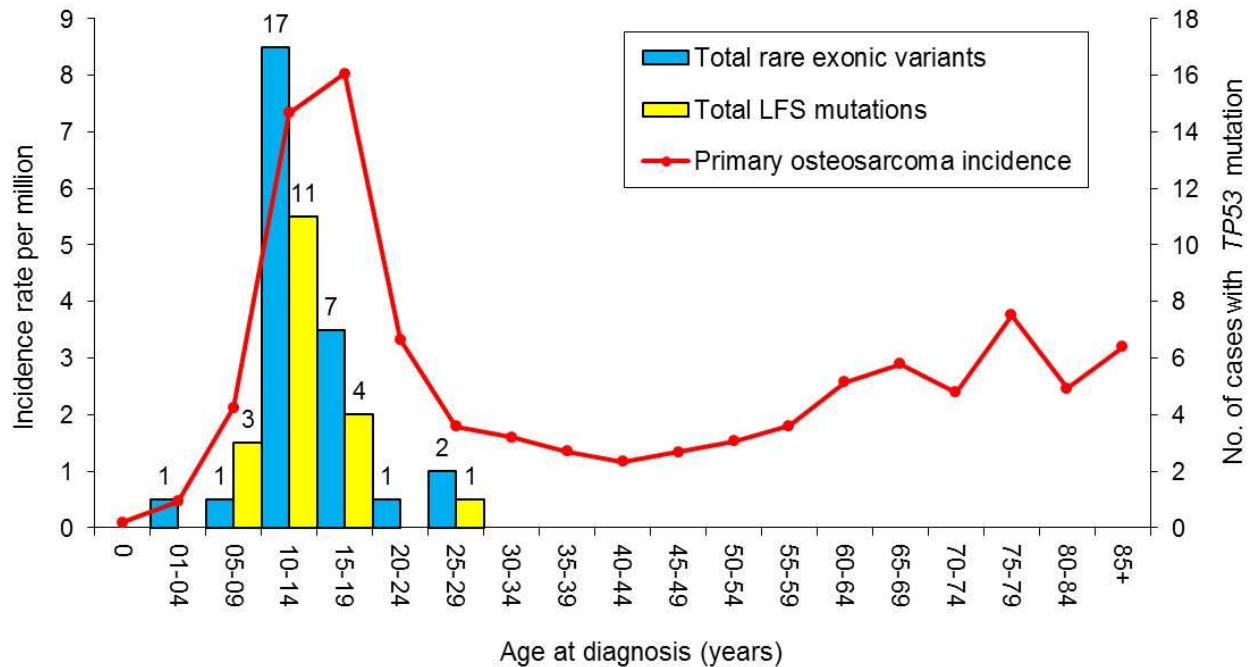

**Supplementary Figure 1.** Osteosarcoma incidence rates using SEER 9 data from 1973-2004 (red line; Mirabello et al., *Cancer* 2009), and the number of patients with *TP53* LFS or likely LFS-associated mutations (yellow bars) and rare exonic variants (blue bars) by age at diagnosis. The number of patients identified in each age group with *TP53* mutations/variants is shown above the bars.
